# Supplementary material for: The extinct shark Otodus megalodon was a transoceanic superpredator: Inferences from 3D modeling
Source: PubMed Central journal article supplement — Sci Adv. 2022 Aug 17;8(33):eabm9424. doi: 10.1126/sciadv.abm9424 (PMC9385135; doi:10.1126/sciadv.abm9424), 2022-08-17
Supplement: sciadv.abm9424_sm.pdf [file sciadv.abm9424_sm.pdf]

Supplementary Materials for  
**The extinct shark *Otodus megalodon* was a transoceanic superpredator:  
Inferences from 3D modeling**

Jack A. Cooper *et al.*

Corresponding author: Catalina Pimiento, [catalina.pimientoherandez@pim.uzh.ch](mailto:catalina.pimientoherandez@pim.uzh.ch);  
John R. Hutchinson, [jhutchinson@rvc.ac.uk](mailto:jhutchinson@rvc.ac.uk).

*Sci. Adv.* **8**, eabm9424 (2022)  
DOI: 10.1126/sciadv.abm9424

**The PDF file includes:**

Figs. S1 to S4  
Tables S1 to S6  
Legend for movie S1  
Legends for data S1 to S5  
References

**Other Supplementary Material for this manuscript includes the following:**

Movie S1  
Data S1 to S5 Available here: <https://doi.org/10.5061/dryad.7h44j0zvw>

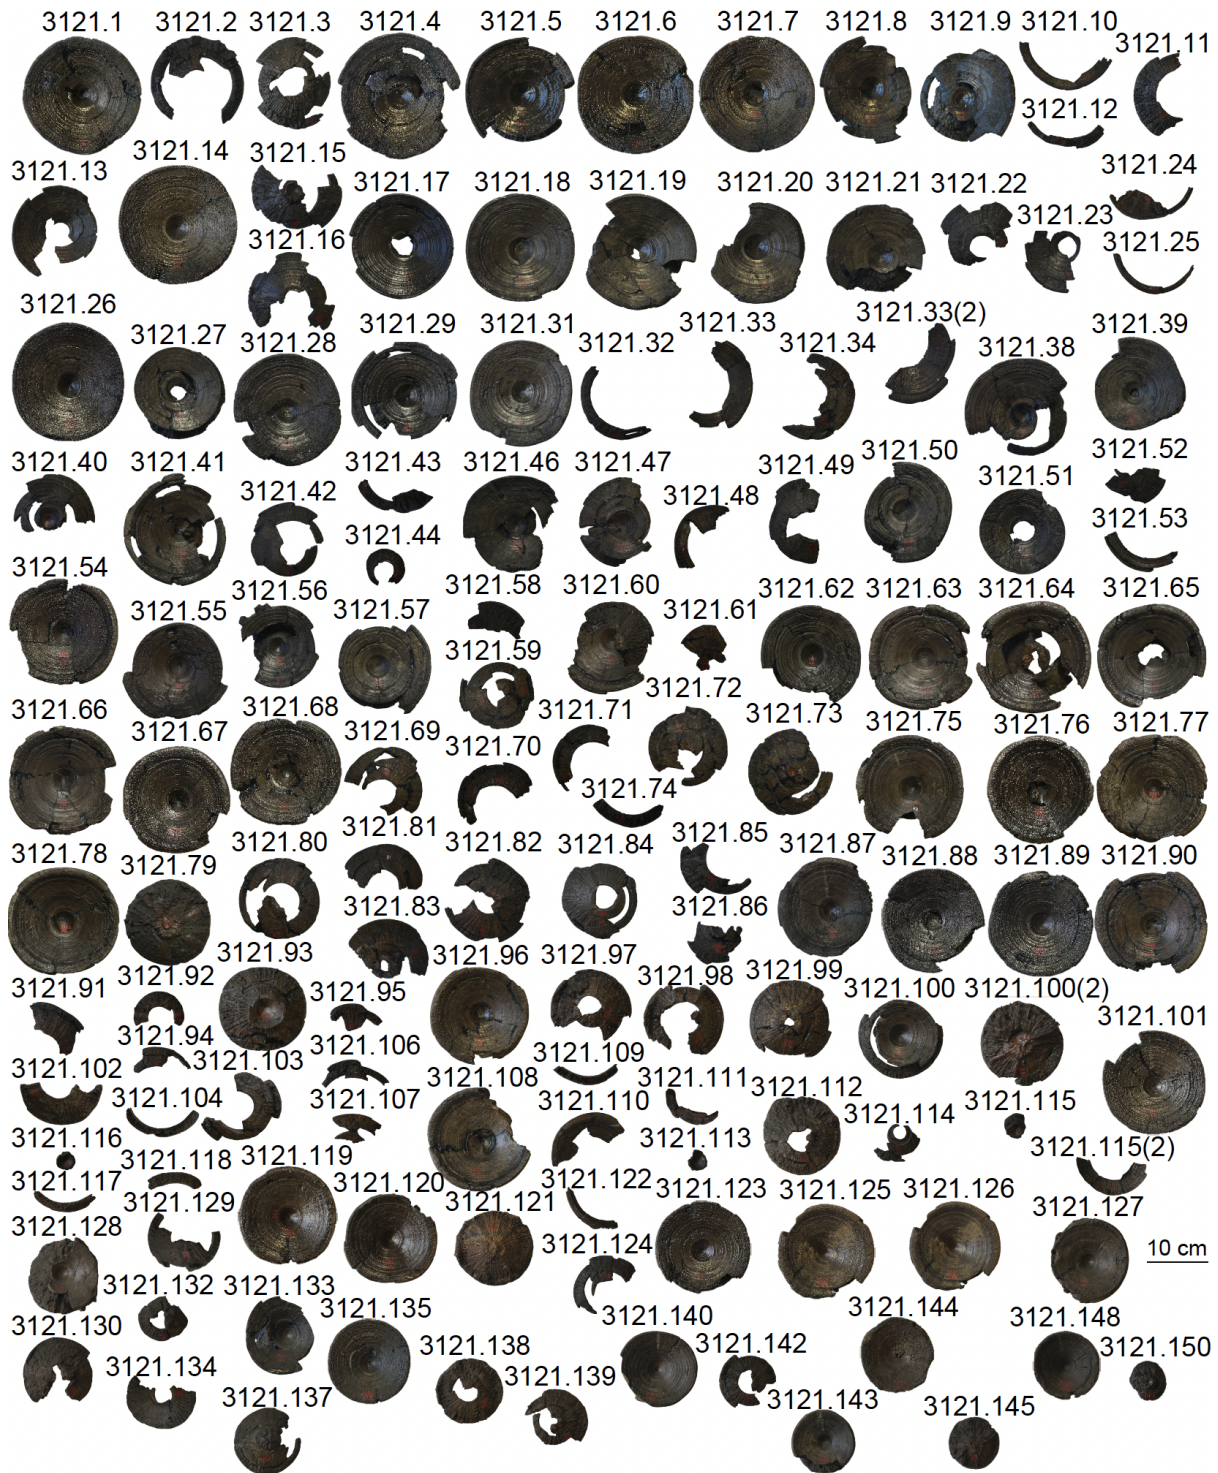

**Figure S1.** All 141 vertebral centra in the *Otodus megalodon* column (IRNSB P 9893). Labelling refers to position of the centra in the column, and the former labelling of the specimen (IRSNB 3121) (7). Centra labelled 30, 35-37, 45, 105, 131, 136, 141, 146, 147 and 149 are missing from the column and there are two centra labelled as 33, 100 and 115 (see main text).

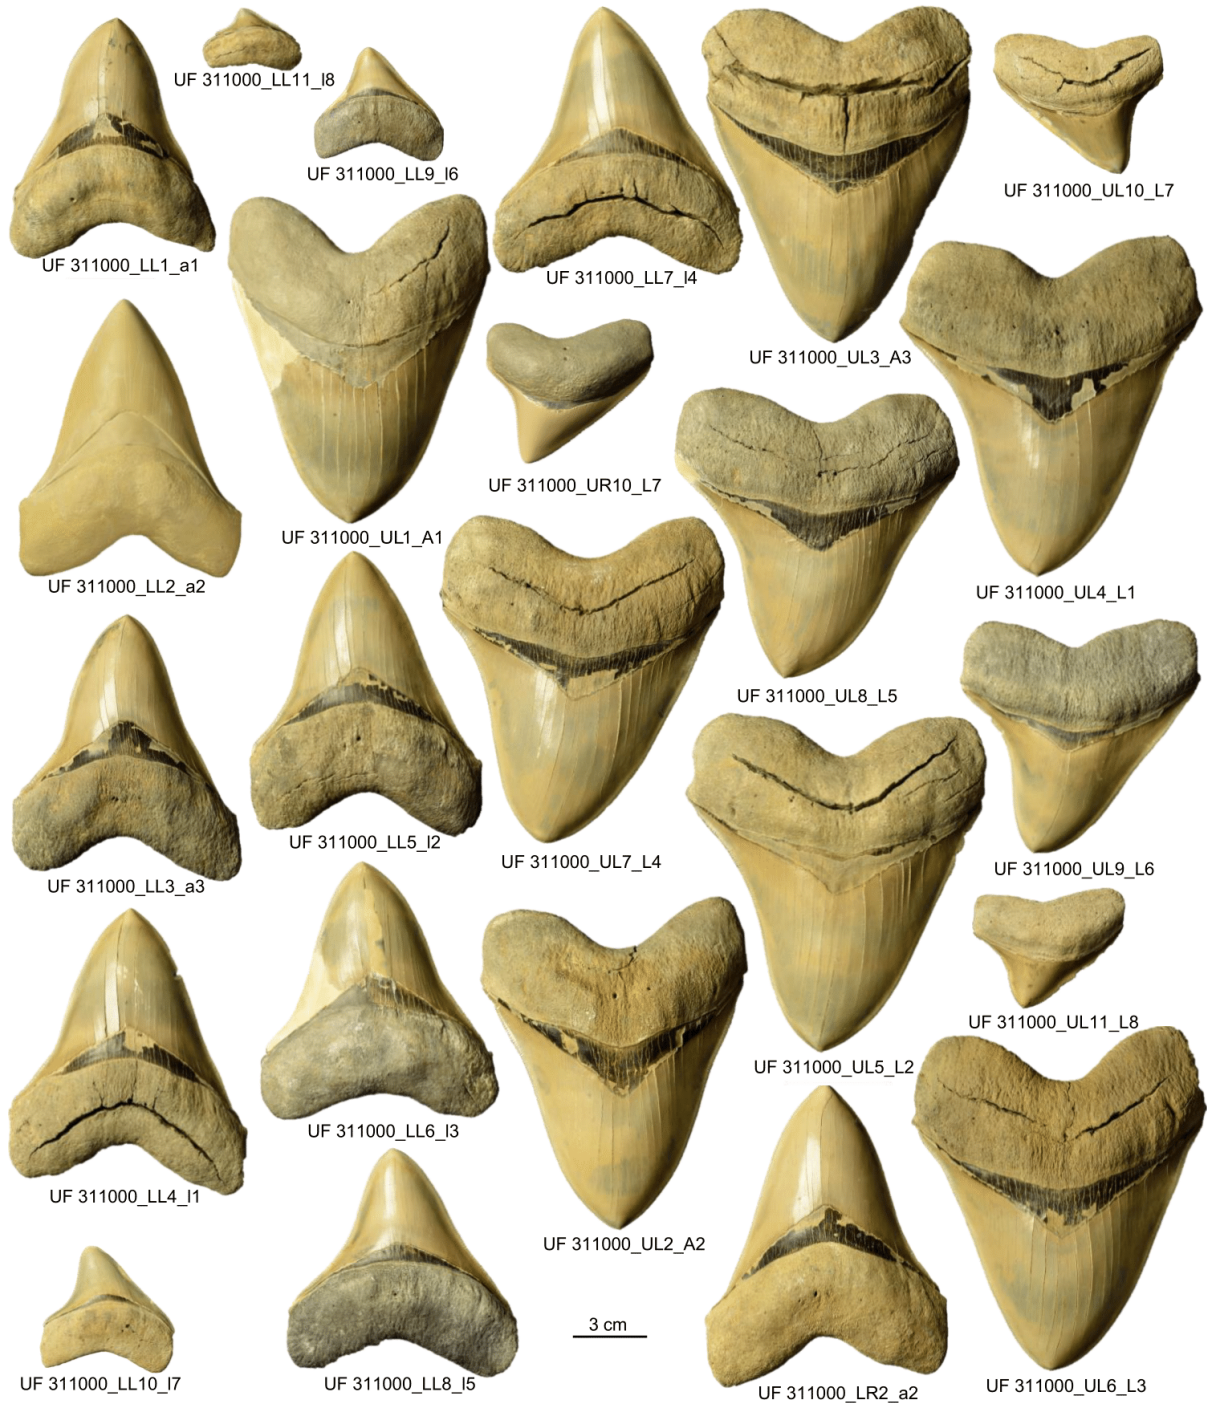

**Figure S2.** All *Otodus megalodon* teeth ( $n = 24$ ) from specimen UF 311000, which formed the basis of our model's jaws. Labelling refers to specimen name, tooth position recorded by the Florida Museum of Natural History (LL = lower left; UL = upper left; LR = lower right; UR = upper right), and the tooth position following standard nomenclature, where A/a refers to anterior teeth and L/l represents lateral teeth. In the latter case, upper-case and lower-case letters indicate upper and lower teeth respectively. Photographs taken from the Florida Museum of Natural History online catalogue.

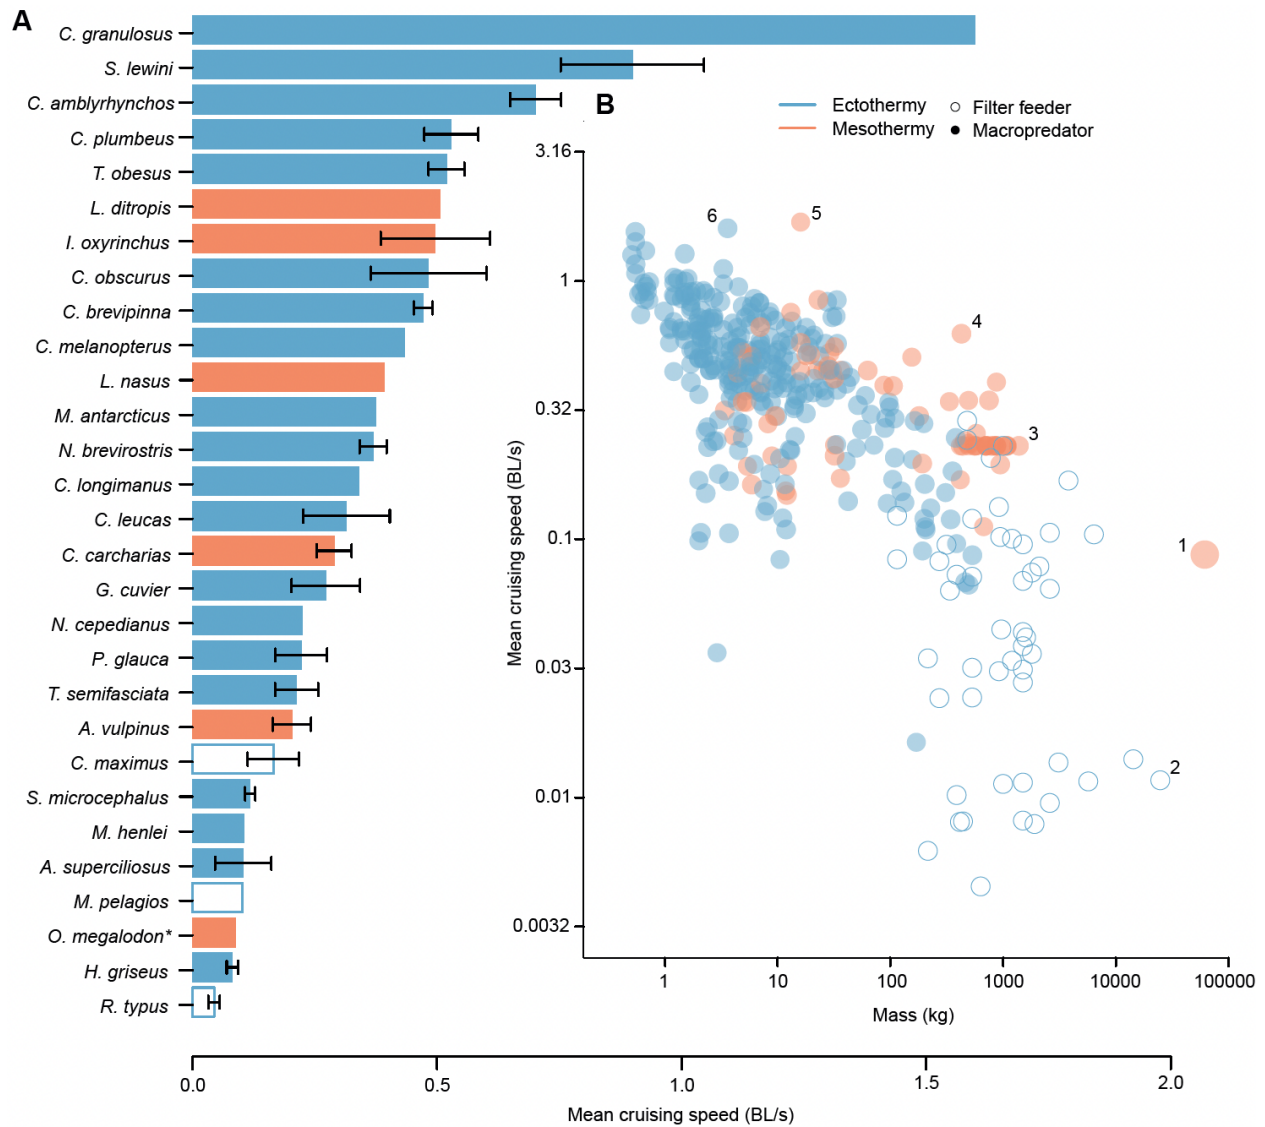

**Figure S3. Shark mean relative cruising speeds.** (A) Mean relative cruising speeds of all shark species from data S1 ( $n = 28$  plus the model *Otodus megalodon*) with error bars drawn from multiple individuals per species. Species without error bars are those where only one individual is represented. An asterisk (\*) indicates that *O. megalodon*'s speed estimate was made from equation 2 rather than from the mean of multiple speeds. (B) Mass and mean relative cruising speed of all individual sharks recorded in data S1 ( $n = 391$  plus the model *O. megalodon*), plotted on a log scale. Numbered individuals are as follows: 1) the 15.9 m, 61,560 kg model individual of *Otodus megalodon*; 2) an 18 m, 24,800 kg individual of the whale shark (*Rhincodon typus*); 3) a 5.3 m, 1,382 kg great white shark (*Carcharodon carcharias*); 4) a 3.6 m, 427.5 kg *C. carcharias*; 5) a 1.1 m, 16 kg shortfin mako shark (*Isurus oxyrinchus*); and 6) a 0.15 m, 3.6 kg gulper shark (*Centrophorus granulosus*).

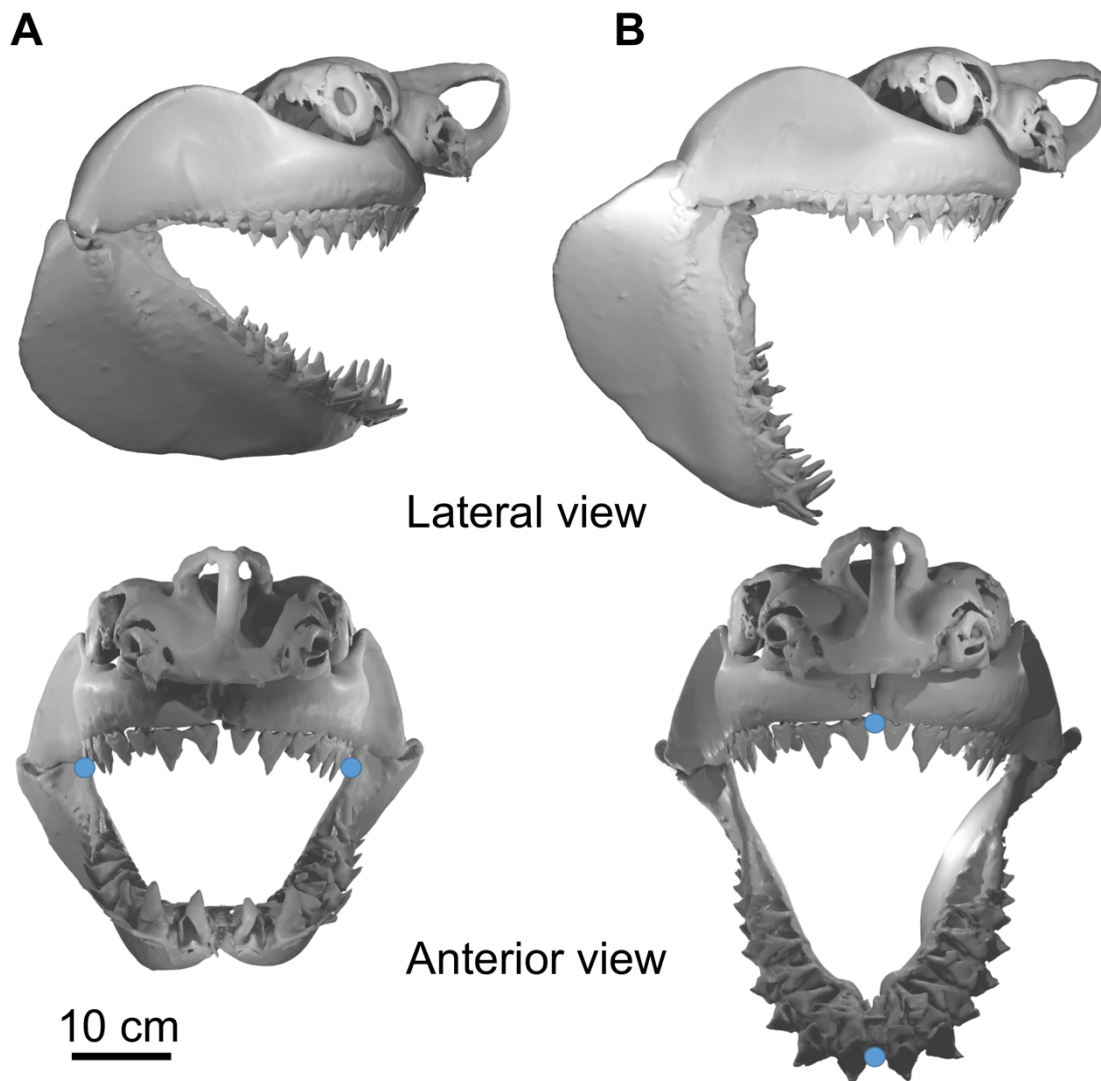

**Figure S4. Gape angles used to estimate gape size of the *Otodus megalodon* model.** This uses a *Carcharodon carcharias* chondrocranium containing the UF 311000 *O. megalodon* teeth at (A) 35°, and (B) 75°. The *C. carcharias* chondrocranium is scaled according to its original size here. Blue landmarks are used in the anterior views to denote the points between which (A) gape width and (B) height were measured.

**Table S1. Summarised occurrence data of putative *Otodus megalodon* prey taxa.** Abundance is categorised based on raw occurrences as: <10 = “Low”; 10-24 = “Medium”; ≥25 = “High”. Daggers (†) denote extinct taxa. Data was downloaded from the Paleobiology Database (<https://paleobiodb.org/>). Max\_ma and Min\_ma represent the earliest and latest occurrence in the Paleobiology Database respectively.

| <b>Taxa</b>                                                        | <b>Occurrences</b> | <b>Abundance</b> | <b>Max_ma</b> | <b>Min_ma</b> |
|--------------------------------------------------------------------|--------------------|------------------|---------------|---------------|
| <i>Phocoena</i>                                                    | 3                  | Low              | 5.333         | 2.588         |
| † <i>Nanosiren</i>                                                 | 12                 | Medium           | 23.03         | 3.6           |
| <i>Stenella</i>                                                    | 10                 | Medium           | 7.246         | 2.588         |
| † <i>Xiphiacetes bossi</i>                                         | 25                 | High             | 23.03         | 2.588         |
| <i>Tursiops</i>                                                    | 10                 | Medium           | 15.97         | 0.781         |
| † <i>Orcinus sp.</i>                                               | 4                  | Low              | 15.97         | 0.781         |
| † <i>Piscobalaena nana</i>                                         | 5                  | Low              | 13.82         | 5.333         |
| † <i>Carcharodon sp.</i>                                           | 34                 | High             | 23.03         | 2.588         |
| † <i>Dioplotherium</i>                                             | 15                 | Medium           | 23.03         | 3.6           |
| † <i>Metaxytherium</i>                                             | 200                | High             | 28.1          | 2.588         |
| <i>Pseudorca</i>                                                   | 5                  | Low              | 5.333         | 2.588         |
| † <i>Balaenoptera spp.</i><br>( <i>cortesii/bertae/davidsoni</i> ) | 55                 | High             | 23.03         | 0.01          |
| <i>Globicephala</i>                                                | 16                 | Medium           | 23.03         | 0.781         |
| <i>Delphinapterus</i>                                              | 2                  | Low              | 15.97         | 0.781         |
| † <i>Dusisiren</i>                                                 | 20                 | Medium           | 15.97         | 3.6           |
| † <i>Hydrodamalis</i>                                              | 27                 | High             | 11.62         | 2.588         |
| <i>Carcharodon carcharias</i>                                      | 58                 | High             | 23.03         | 1.8           |
| <i>Orcinus orca</i>                                                | 1                  | Low              | 5.333         | 3.6           |
| <i>Balaenoptera acutorostrata</i>                                  | 10                 | Medium           | 23.03         | 2.588         |
| <i>Eschrichtius</i>                                                | 1                  | Low              | 3.6           | 2.588         |
| <i>Eubalaena</i>                                                   | 11                 | Medium           | 23.03         | 2.588         |
| <i>Balaena</i>                                                     | 19                 | Medium           | 23.03         | 0.781         |
| <i>Megaptera novaeangliae</i>                                      | 17                 | Medium           | 23.03         | 2.588         |

**Table S2. Comparisons between body dimensions from a *Otodus megalodon* 2D model that accounts for multiple analogues (15) and those from the completed 3D model.** The 19 body-part dimensions measured are as follows: Snout-eye distance (SE); snout-pectoral fin distance (SP); pectoral fin length (PecL) and width (PecW); snout-dorsal fin distance (SD); dorsal fin height (DH) and width (DW); dorsal tip-abdomen distance (DTA); dorsal posterior-abdomen distance (DPA); primary-secondary dorsal fin distance (DD); pectoral-pelvic fin distance (PP); pelvic fin length (PelL) and width (PelW); dorsal side-pelvic fin anterior distance (BPA); pelvic-anal fin distance (PA); secondary dorsal-anal fin distance (DA); dorsal-caudal fin distance (DC); fork height (FH) and tail height (TH). SE was measured using the *C. carcharias* chondrocranium CT scan (71) scaled to fit our model while all other measurements are taken from the completed model.

| Variable | Predicted (15) |                         | Empirical              |                           |
|----------|----------------|-------------------------|------------------------|---------------------------|
|          | Mean (cm)      | Standard deviation (cm) | Model measurement (cm) | Fits mean $\pm$ SD? (Y/N) |
| SE       | 79.34          | 25.44                   | 83.23                  | Y                         |
| SP       | 419.83         | 45.96                   | 391.75                 | Y                         |
| PecL     | 307.07         | 76.88                   | 301.03                 | Y                         |
| PecW     | 164.07         | 31.16                   | 152.15                 | Y                         |
| SD       | 591.11         | 49.93                   | 591.96                 | Y                         |
| DH       | 161.77         | 35.38                   | 162.02                 | Y                         |
| DW       | 198.09         | 29.88                   | 186.54                 | Y                         |
| DTA      | 451.12         | 55.51                   | 447.76                 | Y                         |
| DPA      | 279.19         | 40.08                   | 281.31                 | Y                         |
| DD       | 366.39         | 31.86                   | 353.02                 | Y                         |
| PP       | 350.38         | 57.99                   | 348.43                 | Y                         |
| PelL     | 73.24          | 18.13                   | 74.83                  | Y                         |
| PelW     | 99.34          | 24.34                   | 101.12                 | Y                         |
| BPA      | 195.11         | 19.41                   | 194.71                 | Y                         |
| PA       | 143.37         | 31.86                   | 158.74                 | Y                         |
| DA       | 95.58          | 15.93                   | 96.56                  | Y                         |
| DC       | 804.9          | 46.84                   | 831.09                 | Y                         |
| FH       | 43.5           | 4.84                    | 43.14                  | Y                         |
| TH       | 383.68         | 69.47                   | 355.66                 | Y                         |

**Table S3. Output of the geometric scaling model between body mass and cruising speed from Jacoby et al. (33).** We independently re-collected and re-analysed the data from (33) to both replicate this model and perform our speed comparisons (see main text). Trophic level, temperature and habitat type, which are considered in the model, were gathered from the supplementary material of (33). Converting the intercept and mass coefficients to a power function generates the equation:  $y = 0.266x^{0.082}$ . Note that the exponent of 0.0823 falls within the CI range (0.053-0.249) and that this exponent was found to be 0.15 following correction for phylogeny (33). SE = standard error.

|                                                                                                                                                                                          | <b>Coefficients</b> | <b>SE</b> | <b>T value</b> | <b>P value</b> |
|------------------------------------------------------------------------------------------------------------------------------------------------------------------------------------------|---------------------|-----------|----------------|----------------|
| Intercept                                                                                                                                                                                | -1.328              | 10.143    | -0.131         | 0.898          |
| Log mass                                                                                                                                                                                 | 0.082               | 0.071     | 1.159          | 0.269          |
| Log trophic level                                                                                                                                                                        | -0.164              | 6.949     | -0.024         | 0.982          |
| Temperature – Mixed                                                                                                                                                                      | -8.933              | 8.489     | -1.052         | 0.313          |
| Temperature – Warm                                                                                                                                                                       | -4.447              | 3.582     | -1.242         | 0.238          |
| Habitat type – benthopelagic                                                                                                                                                             | 0.794               | 0.516     | 1.538          | 0.15           |
| Habitat type – demersal                                                                                                                                                                  | -7.578              | 10.298    | -0.736         | 0.476          |
| Habitat type – pelagic-oceanic                                                                                                                                                           | 0.79                | 10.51     | 0.075          | 0.941          |
| Habitat type – reef-associated                                                                                                                                                           | 16.728              | 13.157    | 1.271          | 0.228          |
| $\ln(\text{formula} = \log(\text{Speed}) \sim \log(\text{Mass}) + \log(\text{Trophic level}) * \text{Temperature} * \text{Habitat type}$<br>$F_{(13,12)} = 3.534, R^2 = 0.79, P = 0.018$ |                     |           |                |                |



**Table S4. *C. carcharias* individuals dissected and analysed for stomach volume analysis.**

| <b>Shark</b>    |            | <b>Total length</b> |                       | <b>Stomach volume</b> |
|-----------------|------------|---------------------|-----------------------|-----------------------|
| <b>KZNSB-ID</b> | <b>Sex</b> | <b>(cm)</b>         | <b>Body mass (kg)</b> | <b>(L)</b>            |
| TRA15004        | Male       | 196                 | 67                    | 7.49                  |
| RB15017         | Male       | 263                 | 156                   | 10.86                 |
| RB15023         | Female     | 255                 | 126                   | 12.2                  |
| MG15008         | Female     | 271                 | 188                   | 18.45                 |
| GLN17003        | Male       | 270                 | 162                   | 13                    |
| LEB17007        | Female     | 220                 | 106                   | 12                    |
| RB17031         | Female     | 224                 | 105                   | 18.55                 |
| BAL17003        | Male       | 324                 | 296                   | 42                    |
| LEB18004        | Female     | 310                 | 282                   | 31.8                  |
| SAL18004        | Male       | 204                 | 115                   | 21.3                  |
| RB18037         | Female     | 239                 | 130                   | 8.7                   |
| ZIN09016        | Female     | 437                 | 892                   | 135                   |

**Table S5. Model outputs of the linear regression of body mass and stomach volume in *Carcharodon carcharias*.** SE = Standard error; LCL = Lower limit of the 95% confidence interval; UCL = Upper limit of the 95% confidence interval.  $R^2 = 0.97$ .

|                  | <b>Coefficients</b> | <b>SE</b> | <b>LCL</b> | <b>UCL</b> | <b>t Stat</b> | <b>p-value</b> |
|------------------|---------------------|-----------|------------|------------|---------------|----------------|
| <b>Intercept</b> | -6.54               | 2.48      | -12.07     | -1.02      | -2.64         | 0.02           |
| <b>Body mass</b> | 0.16                | 0.01      | 0.14       | 0.17       | 19.25         | 0.00           |

**Table S6. Literature sources for body size and energy density of putative *Otodus megalodon* prey.** Body mass estimates of each taxon are found in individual literature sources. Energy densities for marine mammal taxa come from estimates for different groups – specifically sirenians (1,257 kcal/kg), dolphins (3,052 kcal/kg), and baleen whales (7,314 kg/kcal) (81-83) – whereas the energy density for *Carcharodon carcharias* is based on the muscle energy density reported in (42). Extinct taxa are denoted by daggers (†).

| Taxa                                                                            | Group        | Body mass reference | Energy density reference |
|---------------------------------------------------------------------------------|--------------|---------------------|--------------------------|
| <i>Phocoena</i> <sup>a</sup>                                                    | Dolphin      | (84)                | 3,052 (83)               |
| † <i>Nanosiren</i> <sup>a</sup>                                                 | Sirenian     | (85)                | 1,257 (82)               |
| <i>Stenella</i> <sup>a</sup>                                                    | Dolphin      | (86)                | 3,052 (83)               |
| † <i>Xiphiacetus bossi</i> <sup>b</sup>                                         | Dolphin      | (87)                | 3,052 (83)               |
| <i>Tursiops</i> <sup>a</sup>                                                    | Dolphin      | (88)                | 3,052 (83)               |
| † <i>Orcinus</i> sp. <sup>a</sup>                                               | Dolphin      | (87)                | 3,052 (83)               |
| † <i>Piscobalaena nana</i> <sup>c,d</sup>                                       | Baleen whale | (89)                | 7,314 (81)               |
| † <i>Carcharodon</i> sp. <sup>e,f</sup>                                         | Shark        | (44)                | 4,400 (42)               |
| † <i>Dioplotherium</i> <sup>a</sup>                                             | Sirenian     | (90)                | 1,257 (82)               |
| † <i>Metaxytherium</i> <sup>a</sup>                                             | Sirenian     | (90)                | 1,257 (82)               |
| <i>Pseudorca</i> <sup>a</sup>                                                   | Dolphin      | (91)                | 3,052 (83)               |
| † <i>Balaenoptera</i> spp.<br>( <i>cortesii/bertae/davidsoni</i> ) <sup>a</sup> | Baleen whale | (92)                | 7,314 (81)               |
| <i>Globicephala</i> <sup>a</sup>                                                | Baleen whale | (93)                | 7,314 (81)               |
| <i>Delphinapterus</i> <sup>a</sup>                                              | Baleen whale | (94)                | 7,314 (81)               |
| † <i>Dusisiren</i> <sup>a</sup>                                                 | Sirenian     | (90)                | 1,257 (82)               |
| † <i>Hydrodamalis</i> <sup>a</sup>                                              | Sirenian     | (90)                | 1,257 (82)               |
| <i>Carcharodon carcharias</i> <sup>f,g</sup>                                    | Shark        | (44)                | 4,400 (42)               |
| <i>Orcinus orca</i> <sup>a,h</sup>                                              | Dolphin      | (95)                | 3,052 (83)               |
| <i>Balaenoptera acutorostrata</i> <sup>a</sup>                                  | Baleen whale | (92)                | 7,314 (81)               |
| <i>Eschrichtius</i> <sup>a</sup>                                                | Baleen whale | (96)                | 7,314 (81)               |
| <i>Eubalaena</i> <sup>a</sup>                                                   | Baleen whale | (97)                | 7,314 (81)               |
| <i>Balaena</i> <sup>a</sup>                                                     | Baleen whale | (98)                | 7,314 (81)               |
| <i>Megaptera novaeangliae</i> <sup>a,i</sup>                                    | Baleen whale | (99)                | 7,314 (81)               |

<sup>a</sup>Genus-level taxa recorded in the Pliocene as reported in (11); <sup>b</sup>fossil evidence of *O. megalodon* bite mark (20); <sup>c</sup>fossil evidence of *O. megalodon* bite mark (19); <sup>d</sup>size estimated based on humerus, radius and ulna (90) and following (100); <sup>e</sup>size based on (14); <sup>f</sup>mass calculated from (44) (see Methods); <sup>g</sup>largest size based on (23, 101); <sup>h</sup>largest male size (95); <sup>i</sup>fossil rib specimen potentially bitten by *O. megalodon* not identified to species-level; however, similar to *M. novaeangliae* (18).

**Movie S1. Rotation videos of all model components (separate file).**

Included model components are as follows: IRSNB P 9893, UF 311000, NSW DPI-WS2006/4 with *O. megalodon* teeth (UF 311000) attached, the South African full-body 3D scan of *C. carcharias*, the final *O. megalodon* model, and the visualised open gape models of 35° and 75° gape angles.

**Data S1. Datasets assembled for this study (Dryad Data Repository).**

Divided into two sheets. *Vertebral column*: Measurement data of IRSNB P 9893 vertebral centra. Preservation state of all vertebrae are labelled as follows: 0) fragmentary; 1) partial preservation; 2) near-complete. *Species comparisons*: Feeding strategy, thermoregulatory ability, body mass and cruising speed for 28 extant species and the *Otodus megalodon* model used in swim speed analysis.

**Data S2. Blender file of the completed *Otodus megalodon* model (Dryad Data Repository).**

**Data S3. Blender file of the 3D scanned *Carcharodon carcharias* used to aid flesh reconstruction (Dryad Data Repository).**

**Data S4. Blender file of the recreated fossil specimen UF 311000 (Dryad Data Repository)**

**Data S5. Blender file of the recreated fossil specimen IRSNB P 9893 (Dryad Data Repository).**

## REFERENCES AND NOTES

1. J. R. Hutchinson, V. Ng-Thow-Hing, F. C. Anderson, A 3D interactive method for estimating body segmental parameters in animals: Application to the turning and running performance of *Tyrannosaurus rex*. *J. Theor. Biol.* **246**, 660–680 (2007).
2. V. Allen, H. Paxton, J. R. Hutchinson, Variation in center of mass estimates for extant sauropsids and its importance for reconstructing inertial properties of extinct archosaurs. *Anat. Rec.* **292**, 1442–1461 (2009).
3. K. T. Bates, P. L. Manning, D. Hodgetts, W. I. Sellers, Estimating mass properties of dinosaurs using laser imaging and 3D computer modelling. *PLOS ONE* **4**, e4532 (2009).
4. J. R. Hutchinson, K. T. Bates, J. Molnar, V. Allen, P. J. Makovicky, A computational analysis of limb and body dimensions in *Tyrannosaurus rex* with implications for locomotion, ontogeny, and growth. *PLOS ONE* **6**, e26037 (2011).
5. G. Hubbell, Using tooth structure to determine the evolutionary history of the white shark, in *Great White Sharks: The Biology of Carcharodon carcharias*, A. P. Klimley, D. G. Ainley, Eds. (Academic Press, 1996), pp. 9–18.
6. C. Pimiento, M. A. Balk, Body-size trends of the extinct giant shark *Carcharocles megalodon*: A deep-time perspective on marine apex predators. *Paleobiology* **41**, 479–490 (2015).
7. M. D. Gottfried, L. J. V. Compagno, S. C. Bowman, Size and skeletal anatomy of the giant “megatooth” shark *Carcharodon megalodon*, in *Great White Sharks: The Biology of Carcharodon carcharias*, A. P. Klimley, D. G. Ainley, Eds. (Academic Press, 1996), pp. 55–66.
8. C. Pimiento, C. F. Clements, When did *Carcharocles megalodon* become extinct? A new analysis of the fossil record *PLOS ONE* **9**, e111086 (2014).
9. C. Pimiento, B. J. MacFadden, C. F. Clements, S. Varela, C. Jaramillo, J. Velez-Juarbe, B. R. Silliman, Geographical distribution patterns of *Carcharocles megalodon* over time reveal clues about extinction mechanisms. *J. Biogeogr.* **43**, 1645–1655 (2016).

10. R. W. Boessenecker, D. J. Ehret, D. J. Long, M. Churchill, E. Martin, S. J. Boessenecker, The early Pliocene extinction of the mega-toothed shark *Otodus megalodon*: A view from the eastern North Pacific. *PeerJ* **7**, e6088 (2019).
11. C. Pimiento, J. N. Griffin, C. F. Clements, D. Silvestro, S. Varela, M. D. Uhen, C. Jaramillo, The Pliocene marine megafauna extinction and its impact on functional diversity. *Nat. Ecol. Evol.* **1**, 1100–1106 (2017).
12. K. Shimada, The relationship between the tooth size and total body length in the white shark. *J. Fossil Res.* **35**, 28–33 (2003).
13. K. Shimada, The size of the megatooth shark, *Otodus megalodon* (Lamniformes: Otodontidae), revisited. *Hist. Biol.* **33**, 904–911 (2019).
14. V. J. Perez, R. M. Leder, T. Badaut, Body length estimation of Neogene lamniform sharks (*Carcharodon* and *Otodus*) derived from associated dentitions. *Palaeontol. Electron.* **24**, a09 (2021).
15. J. A. Cooper, C. Pimiento, H. G. Ferrón, M. J. Benton, Body dimensions of the extinct giant shark *Otodus megalodon*: A 2D reconstruction. *Sci. Rep.* **10**, 14596 (2020).
16. S. E. Bendix-Almgreen, *Carcharodon megalodon* from the Upper Miocene of Denmark, with comments on elasmobranch tooth enameloid: Coronoin. *Bull. Geol. Soc. Denmark* **32**, 1–32 (1983).
17. K. Shimada, M. F. Bonnan, M. A. Becker, M. L. Griffiths, Ontogenetic growth pattern of the extinct megatooth shark *Otodus megalodon*—Implications for its reproductive biology, development, and life expectancy. *Hist. Biol.* **33**, 3254–3259 (2021).
18. R. J. Kallal, S. J. Godfrey, D. J. Ortner, Bone reactions on a Pliocene cetacean rib indicate short-term survival of predation event. *Int. J. Osteoarchaeol.* **22**, 253–260 (2010).
19. A. Collareta, O. Lambert, W. Landini, C. Di Celma, E. Malinverno, R. Varas-Malca, M. Urbina, G. Bianucci, Did the giant extinct shark *Carcharocles megalodon* target small prey? Bite marks on marine mammal remains from the late Miocene of Peru *Palaeogeogr. Palaeoclimatol. Palaeoecol.* **469**, 84–91 (2017).

20. S. J. Godfrey, M. Ellwood, S. Groff, M. S. Verdin, *Carcharocles*-bitten Odontocete caudal vertebrae from the Coastal Eastern United States. *Acta Palaeontol. Pol.* **63**, 463–468 (2018).
21. S. J. Godfrey, J. R. Nance, N. L. Riker, *Otodus*-bitten sperm whale tooth from the Neogene of the Coastal Eastern United States. *Acta Palaeontol. Pol.* **66**, 599–603 (2021).
22. J. E. Martin, T. Tacail, S. Adnet, C. Girard, V. Balter, Calcium isotopes reveal the trophic position of extant and fossil elasmobranchs. *Chem. Geol.* **415**, 118–125 (2015).
23. G. Cliff, S. F. J. Dudley, B. Davis, Sharks caught in the protective gill nets off Natal, South Africa. 2. The great white shark *Carcharodon carcharias* (Linnaeus). *S. Afr. J. Mar. Sci.* **8**, 131–144 (1989).
24. I. K. Fergusson, Distribution and autoecology of the white shark in the Eastern North Atlantic and the Mediterranean Sea, in *Great White Sharks: The Biology of Carcharodon carcharias*, A. P. Klimley, D. G. Ainley, Eds. (Academic Press, 1996), pp. 321–345.
25. R. Bonfil, M. Meyer, M. C. Scholl, R. Johnson, S. O'Brien, H. Oosthuizen, S. Swanson, D. Kotze, M. Paterson, Transoceanic migration, spatial dynamics, and population linkages of white sharks. *Science* **310**, 100–103 (2005).
26. H. G. Ferrón, Regional endothermy as a trigger for gigantism in some extinct macropredatory sharks. *PLOS ONE* **12**, e0185185 (2017).
27. D. M. P. Jacoby, P. Siriwat, R. Freeman, C. Carbone, Correction to 'Is the scaling of swim speed in sharks driven by metabolism?'. *Biol. Lett.* **12**, 20160775 (2016).
28. K. A. Dickson, J. B. Graham, Evolution and consequences of endothermy in fishes. *Physiol. Biochem. Zool.* **77**, 998–1018 (2004).
29. H. G. Ferrón, C. Martínez-Pérez, H. Botella, The evolution of gigantism in active marine predators. *Hist. Biol.* **30**, 712–716 (2017).

30. D. J. Ehret, B. J. MacFadden, D. S. Jones, T. J. Devries, D. A. Foster, R. Salas-Gismondi, Origin of the white shark *Carcharodon* (Lamniformes: Lamnidae) based on recalibration of the Upper Neogene Pisco Formation of Peru. *Palaeontology* **55**, 1139–1153 (2012).
31. P. Cignoni, M. Callieri, M. Corsini, M. Dellepiane, F. Ganovelli, G. Ranzuglia, Meshlab: An open-source mesh processing tool, in *Eurographics Italian Chapter Conference* (The Eurographics Association, 2008), pp. 129–136.
32. A. C. Gleiss, J. Potvin, J. A. Goldbogen, Physical trade-offs shape the evolution of buoyancy control in sharks. *Proc. R. Soc. B* **284**, 20171345 (2017).
33. D. M. P. Jacoby, P. Siriwat, R. Freeman, C. Carbone, Is the scaling of swim speed in sharks driven by metabolism? *Biol. Lett.* **11**, 20150781 (2015).
34. M. R. Hirt, W. Jetz, B. C. Rall, U. Brose, A general scaling law reveals why the largest animals are not the fastest. *Nat. Ecol. Evol.* **1**, 1116–1122 (2017).
35. C. Pimiento, J. L. Cantalapiedra, K. Shimada, D. J. Field, J. B. Smaers, Evolutionary pathways toward gigantism in sharks and rays. *Evolution* **73**, 588–599 (2019).
36. W. N. Joyce, S. E. Campana, L. J. Natanson, N. E. Kohler, H. L. Pratt Jr., C. F. Jensen, Analysis of stomach contents of the porbeagle shark (*Lamna nasus* Bonnaterre) in the northwest Atlantic. *ICES J. Mar. Sci.* **59**, 1263–1269 (2002).
37. D. C. Bernvi, “Ontogenetic influences on endothermy in the great white shark (*Carcharodon carcharias*),” thesis, Stockholm University (2016).
38. F. G. Carey, J. W. Kanwisher, O. Brazier, G. Gabrielson, J. G. Casey, H. L. Pratt Jr., Temperature and activities of a white Shark, *Carcharodon carcharias*, *Copeia* **1982**, 254–260 (1982).
39. S. C. Leigh, Y. Papastamatiou, D. P. German, The nutritional physiology of sharks. *Rev. Fish Biol. Fish.* **27**, 561–585 (2017).
40. C. Lockyer, Body weights of some species of large whales. *ICES J. Mar. Sci.* **36**, 259–273 (1976).



41. D. J. Struntz, W. A. McLellan, R. M. Dillaman, J. E. Blum, J. R. Kucklick, D. A. Pabst, Blubber development in bottlenose dolphins (*Tursiops truncatus*). *J. Morphol.* **259**, 7–20 (2004).
42. H. R. Pethybridge, C. C. Parrish, B. D. Bruce, J. W. Young, P. D. Nichols, Lipid, fatty acid and energy density profiles of white sharks: Insights into the feeding ecology and ecophysiology of a complex top predator. *PLOS ONE* **9**, e97877 (2014).
43. T. Lingham-Soliar, Caudal fin allometry in the white shark *Carcharodon carcharias*: Implications for locomotory performance and ecology. *Naturwissenschaften* **92**, 231–236 (2005).
44. H. F. Mollet, G. M. Cailliet, Using allometry to predict body mass from linear measurements of the white shark, in *Great White Sharks: The Biology of Carcharodon carcharias*, A. P. Klimley, D. G. Ainley, Eds. (Academic Press, 1996), pp. 81–89.
45. D. W. Stephens, E. L. Charnov, Optimal foraging: Some simple stochastic models. *Behav. Ecol. Sociobiol.* **10**, 251–263 (1982).
46. R. P. Wilson, M. D. Holton, A. Neate, M. Del’Caño, F. Quintana, K. Yoda, A. Gómez-Laich, Luck and tactics in foraging success: The case of the imperial shag. *Mar. Ecol. Prog. Ser.* **682**, 1–12 (2022).
47. B. W. Kent, The cartilaginous fishes (chimaeras, sharks and rays) of Calvert Cliffs, Maryland, USA, in *The Geology and Vertebrate Paleontology of Calvert Cliffs, Maryland, USA*, S. J. Godfrey, Ed. (Smithsonian Institution Scholarly Press, 2018), pp. 45–157.
48. P. C. Sternes, J. J. Wood, K. Shimada, Body forms of extant lamniform sharks (Elasmobranchii: Lamniformes), and comments on the morphology of the extinct megatooth shark, *Otodus megalodon*, and the evolution of lamniform thermophysiology. *Hist. Biol.* 1–13 (2022).
49. D. Bernal, K. A. Dickson, R. E. Shadwick, J. B. Graham, Review: Analysis of the evolutionary convergence for high performance swimming in lamnid sharks and tunas. *Comp. Biochem. Physiol. A Mol. Integr. Physiol.* **129**, 695–726 (2001).

50. J. M. Donley, C. A. Sepulveda, P. Konstantinidis, S. Gemballa, R. E. Shadwick, Convergent evolution in mechanical design of lamnid sharks and tunas. *Nature* **429**, 61–65 (2004).
51. Y. Y. Watanabe, K. J. Goldman, J. E. Caselle, D. D. Chapman, Y. P. Papastamatiou, Comparative analyses of animal-tracking data reveal ecological significance of endothermy in fishes. *Proc. Natl. Acad. Sci. U.S.A.* **112**, 6104–6109 (2015).
52. L. Harding, A. Jackson, A. Barnett, I. Donohue, L. Halsey, C. Huveneers, C. Meyer, Y. Papastamatiou, J. M. Semmens, E. Spencer, Y. Watanabe, N. Payne, Endothermy makes fishes faster but does not expand their thermal niche. *Funct. Ecol.* **35**, 1951–1959 (2021).
53. D. A. Ebert, S. L. Fowler, L. J. V. Compagno, *Sharks of the World: A Fully Illustrated Guide* (Wild Nature Press, 2013).
54. T. Lingham-Soliar, Convergence in thunniform anatomy in lamnid sharks and Jurassic ichthyosaurs. *Integr. Comp. Biol.* **56**, 1323–1336 (2016).
55. A. Bernard, C. Lécuyer, P. Vincent, R. Amiot, N. Bardet, E. Buffetaut, G. Cuny, F. Fourrel, F. Martineau, J. Mazin, A. Prieur, Regulation of body temperature by some Mesozoic marine reptiles. *Science* **328**, 1379–1382 (2010).
56. D. Bernal, C. A. Sepulveda, Evidence for temperature elevation in the aerobic swimming musculature of the common thresher shark, *Alopias vulpinus*, *Copeia* **2005**, 146–151 (2005).
57. G. Del Raye, S. J. Jorgensen, K. Krumhansl, J. M. Ezcurra, B. A. Block, Travelling light: White sharks (*Carcharodon carcharias*) rely on body lipid stores to power ocean-basin scale migration. *Proc. R. Soc. B* **280**, 20130836 (2013).
58. C. E. Doughty, J. Roman, S. Faurby, A. Wolf, A. Haque, E. S. Bakker, Y. Malhi, J. B. Dunning, Jr., J. -C. Svenning, Global nutrient transport in a world of giants. *Proc. Natl. Acad. Sci. U.S.A.* **113**, 868–873 (2016).
59. R. A. Myers, J. K. Baum, T. D. Shepherd, S. P. Powers, C. H. Peterson, Cascading effects of the loss of apex predatory sharks from a coastal ocean. *Science* **315**, 1846–1850 (2007).

60. C. G. Diedrich, Evolution of white and megatooth sharks, and evidence for early predation on seals, sirenians, and whales. *Nat. Sci.* **5**, 1203–1218 (2013).
61. R. A. Martin, N. Hammerschlag, R. S. Collier, C. Fallows, Predatory behaviour of white sharks (*Carcharodon carcharias*) at Seal Island, South Africa. *J. Mar. Biol. Assoc. U.K.* **85**, 1121–1135 (2005).
62. R. A. Martin, N. Hammerschlag, Marine predator–prey contests: Ambush and speed versus vigilance and agility. *Mar. Biol. Res.* **8**, 90–94 (2012).
63. S. J. Jorgensen, S. Anderson, F. Ferretti, J. R. Tietz, T. Chapple, P. Kanive, R. W. Bradley, J. H. Moxley, B. A. Block, Killer whales redistribute white shark foraging pressure on seals. *Sci. Rep.* **9**, 6153 (2019).
64. G. Bianucci, W. Landini, Killer sperm whale: A new basal physeteroid (Mammalia, Cetacea) from the Late Miocene of Italy. *Zool. J. Linn. Soc.* **148**, 103–131 (2006).
65. E. Peri, P. L. Falkingham, A. Collareta, G. Bianucci, Biting in the Miocene seas: Estimation of the bite force of the macroraptorial sperm whale *Zygophyseter varolai* using finite element analysis. *Hist. Biol.* 1–12 (2021).
66. L. O. Lucifora, V. B. García, R. C. Menni, A. H. Escalante, N. M. Hozbor, Effects of body size, age and maturity stage on diet in a large shark: Ecological and applied implications. *Ecol. Res.* **24**, 109–118 (2009).
67. J. A. Goldbogen, D. E. Cade, D. M. Wisniewska, J. Potvin, P. S. Segre, M. S. Savoca, E. L. Hazen, M. F. Czapanskiy, S. R. Kahane-Rapport, S. L. DeRuiter, S. Gero, P. Tønnesen, W. T. Gough, M. B. Hanson, M. M. Holt, F. H. Jensen, M. Simon, A. K. Stimpert, P. Arranz, D. W. Johnston, D. P. Nowacek, S. E. Parks, F. Visser, A. S. Friedlaender, P. L. Tyack, P. T. Madsen, N. D. Pyenson, Why whales are big but not bigger: Physiological drivers and ecological limits in the age of ocean giants. *Science* **366**, 1367–1372 (2019).
68. A. M. Pagano, T. M. Williams, Physiological consequences of Arctic sea ice loss on large marine carnivores: Unique responses by polar bears and narwhals. *J. Exp. Biol.* **224**, jeb228049 (2021).

69. J. A. Goldbogen, Physiological constraints on marine mammal body size. *Proc. Natl. Acad. Sci. U.S.A.* **115**, 3995–3997 (2018).
70. J. Kriwet, H. Mewis, O. Hampe, A partial skeleton of a new lamniform mackerel shark from the Miocene of Europe. *Acta Palaeontol. Pol.* **60**, 857–875 (2014).
71. S. Wroe, D. R. Huber, M. Lowry, C. McHenry, K. Moreno, P. Clausen, T. L. Ferrara, E. Cunningham, M. N. Dean, A. P. Summers, Three-dimensional computer analysis of white shark jaw mechanics: How hard can a great white bite? *J. Zool.* **276**, 336–342 (2008).
72. A. Larramendi, G. S. Paul, S.-Y. Hsu, A review and reappraisal of the specific gravities of present and past multicellular organisms, with an emphasis on tetrapods. *Anat. Rec.* **304**, 1833–1888 (2020).
73. T. L. Ferrara, P. Clausen, D. R. Huber, C. R. McHenry, V. Peddemors, S. Wroe, Mechanics of biting in great white and sandtiger sharks. *J. Biomech.* **44**, 430–435 (2011).
74. C. D. Wilga, P. J. Motta, C. P. Sanford, Evolution and ecology of feeding in elasmobranchs. *Integr. Comp. Biol.* **47**, 55–69 (2007).
75. R. Froese, D. Pauly, FishBase World wide web electronic publication, version (01/2017); [www.fishbase.org](http://www.fishbase.org) [accessed June 2020].
76. T. Kubodera, H. Watanabe, T. Ichii, Feeding habits of the blue shark, *Prionace glauca*, and salmon shark, *Lamna ditropis*, in the transition region of the Western North Pacific. *Rev. Fish Biol. Fish.* **17**, 111–124 (2006).
77. J. M. Ezcurra, C. G. Lowe, H. F. Mollet, L. A. Ferry, J. B. O’Sullivan, Oxygen consumption rate of young-of-the-year white sharks, *Carcharodon carcharias*, during transport to the Monterey Bay aquarium, in *Global Perspectives on the Biology and Life History of the Great White Shark*, M. L. Domeier, Ed. (CRC Press, 2012), pp. 17–25.
78. T. C. Tricas, J. E. McCosker, Predatory behavior of the white shark (*Carcharodon carcharias*), with notes on its biology. *Proc. Calif. Acad. Sci.* **43**, 221–238 (1984).

79. R. P. Wilson, A. Neate, M. D. Holton, E. L. C. Shepard, D. M. Scantlebury, S. A. Lambertucci, A. di Virgilio, E. Crooks, C. Mulvenna, N. Marks, Luck in food finding affects individual performance and population trajectories. *Curr. Biol.* **28**, 3871–3877.e5 (2018).
80. K. O. Lear, D. L. Morgan, J. M. Whitty, N. M. Whitney, E. E. Byrnes, S. J. Beatty, A. C. Gleiss, Divergent field metabolic rates highlight the challenges of increasing temperatures and energy limitation in aquatic ectotherms. *Oecologia* **193**, 311–323 (2020).
81. E. Nordøy, L. Folkow, P.-E. Mtensson, A. Blix, Food requirements of Northeast Atlantic minke whales, in *Developments in Marine Biology* (Elsevier, 1995), pp. 307–317.
82. P. C. Valery, T. Ibiebele, M. Harris, A. C. Green, A. Cotterill, A. Moloney, A. K. Sinha, G. Garvey, Diet, physical activity, and obesity in school-aged indigenous youths in northern Australia. *J. Obes.* **2012**, 1–12 (2012).
83. B. Davidson, G. Cliff, Comparison of pinniped and cetacean prey tissue lipids with lipids of their elasmobranch predator. *In Vivo* **28**, 223–228 (2014).
84. W. A. McLellan, H. N. Koopman, S. A. Rommel, A. J. Read, C. W. Potter, J. R. Nicolas, A. J. Westgate, D. A. Pabst, Ontogenetic allometry and body composition of harbour porpoises (*Phocoena phocoena*, L.) from the western North Atlantic. *J. Zool.* **257**, 457–471 (2002).
85. D. P. Domning, O. A. Aguilera, Fossil Sirenia of the West Atlantic and Caribbean region. VIII. *Nanosiren garciae*, gen. et sp. nov. and *Nanosiren sanchezi*, sp. nov. *J. Vertebr. Paleontol.* **28**, 479–500 (2008).
86. W. F. Perrin, M. L. L. Dolar, C. M. Chan, S. J. Chivers, Length-weight relationships in the spinner dolphin (*Stenella longirostris*). *Mar. Mamm. Sci.* **21**, 765–778 (2005).
87. S. H. Montgomery, J. H. Geisler, M. R. McGowen, C. Fox, L. Marino, J. Gatesy, The evolutionary history of cetacean brain and body size. *Evolution* **67**, 3339–3353 (2013).
88. H. Shirihai, B. Jarrett, G. M. Kirwan, *Whales, Dolphins, and Other Marine Mammals of the World* (Princeton Univ. Press, 2006).

89. V. Bouetel, C. de Muizon, The anatomy and relationships of *Piscobalaena nana* (Cetacea, Mysticeti), a Cetotheriidae s.s. from the early Pliocene of Peru. *Geodiversitas* **28**, 319–395 (2006).
90. D. K. Sarko, D. P. Domning, L. Marino, R. L. Reep, Estimating body size of fossil sirenians. *Mar. Mamm. Sci.* **26**, 937–959 (2010).
91. P. J. Stacey, R. W. Baird, S. Leatherwood, *Pseudorca crassidens*. *Mar. Mamm. Sci.* **456**, 1–6 (1994).
92. L. P. Folkow, A. S. Blix, Metabolic rates of minke whales (*Balaenoptera acutorostrata*) in cold water. *Acta Physiol. Scand.* **146**, 141–150 (1992).
93. T. A. Jefferson, M. A. Webber, R. L. Pitman, *Marine Mammals of the World: A Comprehensive Guide to Their Identification* (Elsevier, 2008).
94. D. E. Sergeant, P. F. Brodie, Body size in white whales, *Delphinapterus leucas*, *J. Fish. Board Can.* **26**, 2561–2580 (1969).
95. R. W. Baird, R. W. Baird, *Killer Whales of the World: Natural History and Conservation* (Voyageur Press, 2006).
96. S. Agbayani, S. M. E. Fortune, A. W. Trites, Growth and development of North Pacific gray whales (*Eschrichtius robustus*). *J. Mammal.* **101**, 742–754 (2020).
97. S. M. E. Fortune, M. J. Moore, W. L. Perryman, A. W. Trites, Body growth of North Atlantic right whales (*Eubalaena glacialis*) revisited. *Mar. Mamm. Sci.* **37**, 433–447 (2020).
98. R. M. Nowak, *Walker's Mammals of the World* (John Hopkins Univ. Press, 1999).
99. L. Riekkola, V. Andrews-Goff, A. Friedlaender, A. N. Zerbini, R. Constantine, Longer migration not necessarily the costliest strategy for migrating humpback whales. *Aquat. Conserv.* **30**, 937–948 (2020).
100. M. R. McCurry, F. G. Marx, A. R. Evans, T. Park, N. D. Pyenson, N. Kohno, S. Castiglione, E. M. G. Fitzgerald, Brain size evolution in whales and dolphins: New data from fossil mysticetes. *Biol. J. Linn. Soc.* **133**, 990–998 (2021).

101. C. R. McClain, M. A. Balk, M. C. Benfield, T. A. Branch, C. Chen, J. Cosgrove, A. D. Dove, L. C. Gaskins, R. R. Helm, F. G. Hochberg, F. B. Lee, A. Marshall, S. E. McMurray, C. Schanche, S. N. Stone, A. D. Thaler, Sizing ocean giants: Patterns of intraspecific size variation in marine megafauna. *PeerJ* **3**, e715 (2015).
